# Supplementary material for: Extrinsic wheat fibre consumption enhances faecal bulk and stool frequency; a randomized controlled trial
Source: Royal Society of Chemistry journal article supplement (doi:10.1039/c8fo01649f), 2019-01-01
Supplement: c8fo01649f2.xlsx [file c8fo01649f2.xlsx]

## Sheet: Suppl table 1
Supplementary table 1. Composition of control food products and food products enriched with extrinsic wheat fibre.
	Control food products							Extrinsic wheat fibre-enriched food products
	protein [g/100g]	fat [g/100g]	total dietary fibre [g/100g]	dietary fibre from EWF [g/100g]	net carbohydrates [g/100g]	calories [kcal/100g]	kilojoules [kJ/100g]	protein [g/100g]	fat [g/100g]	total dietary fibre [g/100g]	dietary fibre from EWF [g/100g]	net carbohydrates [g/100g]	calories [kcal/100g]	kilojoules [kJ/100g]
Rolls	7.97041	2.12426	3.41716		53.8905	273.396	1157.57	7.94766	2.32507	9.33678	5.11295	46.5227	257.547	1087
Toast bread	7.56293	3.95479	3.03488		50.1639	272.635	1152.24	7.86443	4.80501	7.23356	3.97005	43.8551	264.769	1115.66
Cookies	8.71967	22.015	3.03733		64.5604	499.41	2093.63	8.33889	23.2037	7.23089	4.176	58.184	491.48	2056.34
Pancake	4.5	4.125	0.75		22.6875	147.375	620.812	4.1375	3.78125	3.5875	2.9	20.7969	140.944	592.491
Pizza	11.3382	10.5306	1.85452		27.9424	255.887	1073.45	11.1357	11.9837	3.84541	2.12114	26.0386	264.511	1107.29
Pasta tomato/fantasy sauce	1.87676	0.31512	0.75582		7.43479	43.2005	183.246	1.88051	0.31512	2.14782	1.392	5.99929	40.2575	170.042
Instant potato soup	0.926874	2.78685	0.526437		8.38993	63.3885	265.728	0.932874	2.78685	1.91844	1.392	8.38993	66.1965	276.966
Meat loaf	11.3723	25.8778	0		0.0255	278.442	1151.02	10.5774	24.0594	2.07349	2.07872	0	262.991	1086.6
Meatballs	15.8056	20.3728	0.38676		7.28842	276.522	1149.56	13.6933	17.6284	3.16282	2.5056	6.32055	245.051	1017.85
Pasta: Spaghetti	12	1.5	3		75	368	1559	11	1.5	11	7.424	64	336	1419
Pasta: Penne Rigate	12	1.52941	3		75	368	1559	11	1.5	11	7.424	64	336	1419
EWF: extrinsic wheat fibre (=VITACEL wheat fibre®)

## Sheet: Suppl table 2
Supplementary table 2. Composition of meal boxes.
		box 1			box 2			box 3			box 4			box 5			box 6			box 7			box 8			box 9			box 10
	portion size	#	total gr/ml	EWF* (gr)	#	total gr/ml	EWF* (gr)	#	total gr/ml	EWF* (gr)	#	total gr/ml	EWF* (gr)	#	total gr/ml	EWF* (gr)	#	total gr/ml	EWF* (gr)	#	total gr/ml	EWF* (gr)	#	total gr/ml	EWF* (gr)	#	total gr/ml	EWF* (gr)	#	total gr/ml	EWF* (gr)
Toast bread	25 gr	6	150	6	5	125	5	6	150	6	6	150	6	6	150	6	6	150	6	6	150	6	6	150	6
Rolls	50 gr																									2	100	5.1	2	100	5.1
Cookies	20 gr							4	80	3.36	4	80	3.36	2	40	1.68	4	80	3.36	3	60	2.52				3	60	2.52	2	40	1.68
Meat loaf	50 gr													2	100	2.2				2	100	2.2	3	150	3.3	2	50	2.2
Pasta: spaghetti	85 gr							1	85	6.3	1	85	6.3
Pasta: penne	85 gr													1	85	6.3													1	85	6.3
Sauce tomato	100 gr							1	100	1.4																			1	100	1.4
Sauce fantasy	100 gr										1	100	1.4	1	100	1.4
Meatballs	15 gr							10	144	3	10	144	3	8	120	2.4													8	120	2.4
Pizza	350 gr				1	350	7.4										1	350	7.4							1	350	7.4
Pancake mix	320 gr																			1	320	9.3	1	320	9.3
Instant potato soup	200 ml																1	200	2.8				1	200	2.8	1	200	2.8	1	200	2.8
total EWF (gr/box)				6			12.4			20.06			20.06			19.98			19.56			20.02			21.4			20.02			19.68
* EWF: extrinsic wheat fibre (=VITACEL® wheat fibre); only in meal boxes with extrinsic fibre-enriched products, NOT in control boxes
