# Supplementary figures and images for: Extrinsic wheat fibre consumption enhances faecal bulk and stool frequency; a randomized controlled trial
Source: Royal Society of Chemistry journal article supplement (doi:10.1039/c8fo01649f), 2019-01-01

## CONSORT 2010 Flow Diagram

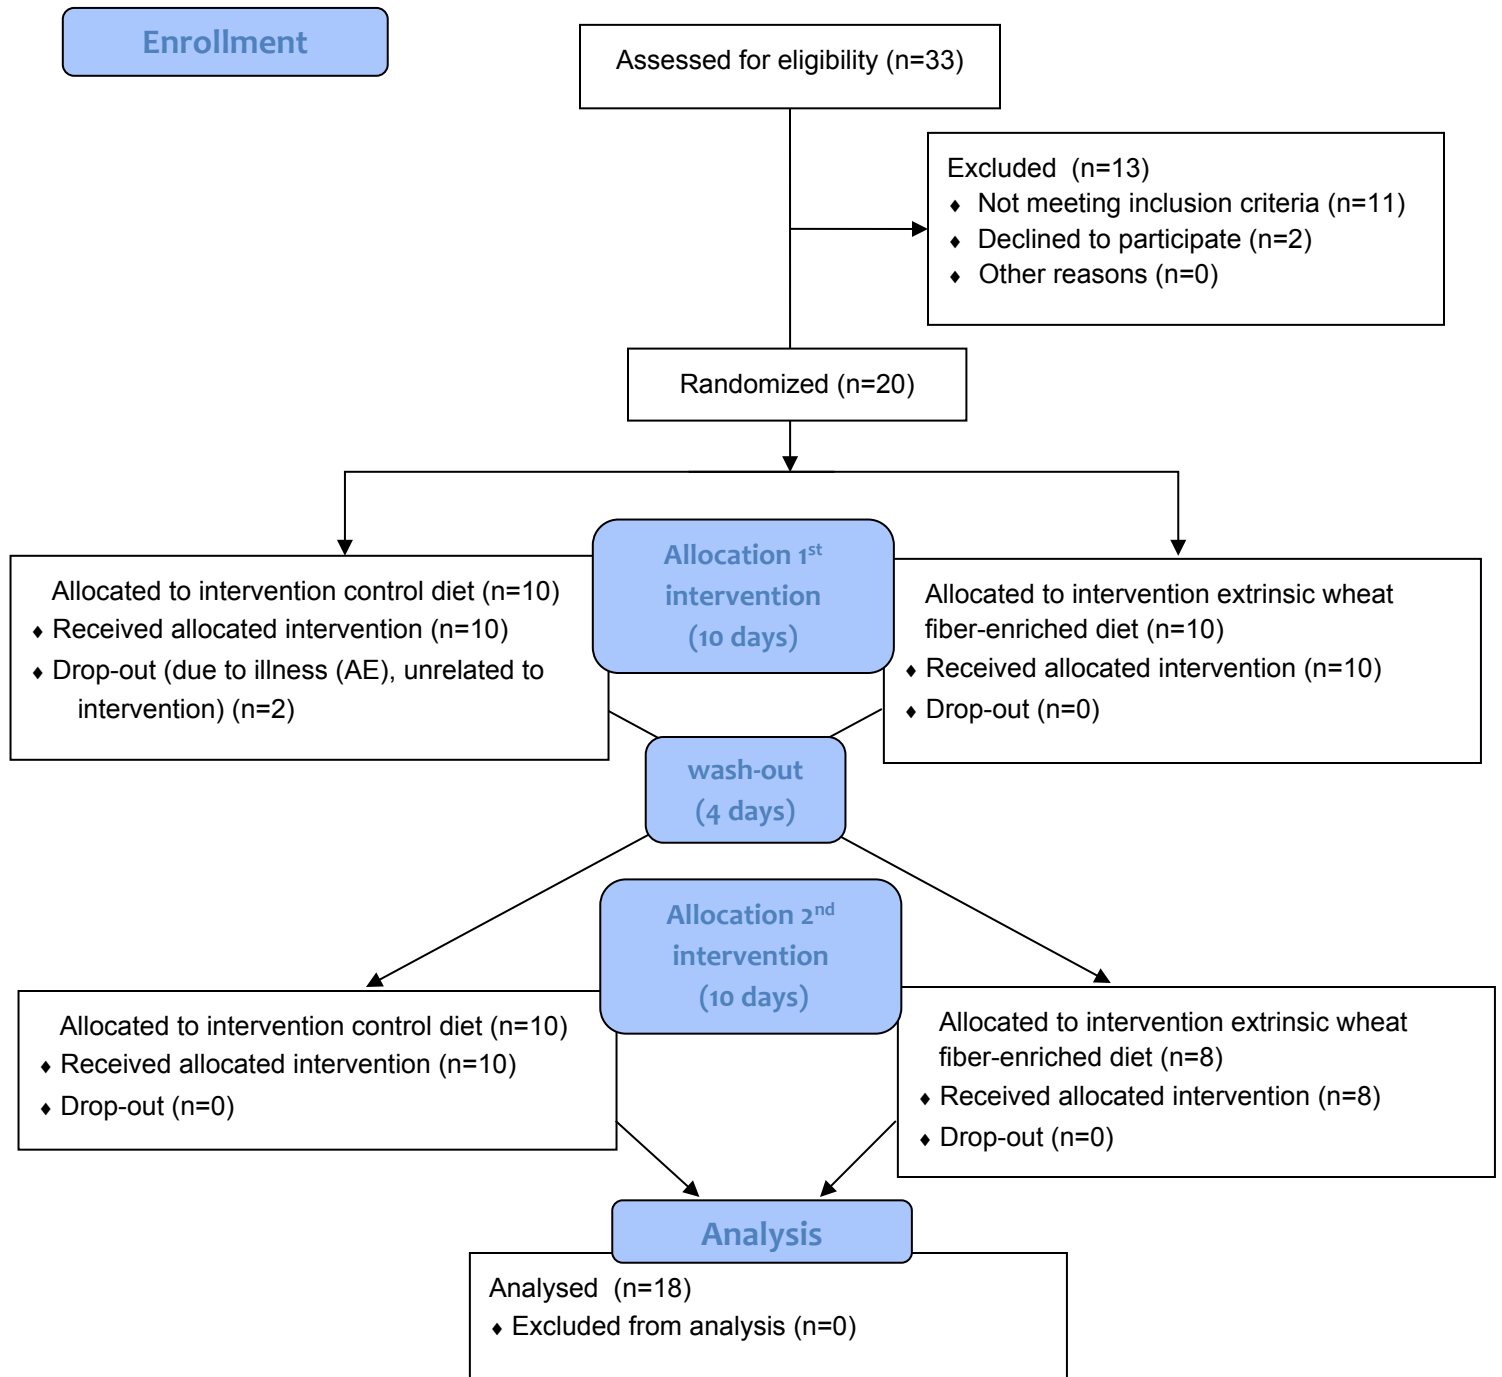

Supplement: c8fo01649f1.pdf [file c8fo01649f1.pdf]
